# Supplementary material for: Root Architectural Adaptations to Phosphorus Deficiency: Unraveling Genotypic Variability in Wheat Seedlings
Source: MDPI journal article supplement (doi:10.3390/agriculture14030447), 2024-03-10
Supplement: s1 [file s1]

Archive with 2 entries (2 files):
- Supplementary File.xlsx
- Supplementary File_final.pdf
