# Supplementary material for: Root Architectural Adaptations to Phosphorus Deficiency: Unraveling Genotypic Variability in Wheat Seedlings
Source: MDPI journal article supplement (doi:10.3390/agriculture14030447), 2024-03-10
Supplement: s1 [file s1 › Supplementary File.xlsx]

## Sheet: Table S2
Table S2: Pedigree details of 204 diverse wheat accessions originated from nine countries grown in hydroponics culture under low P and optimum P treatment conditions (Source:http://wheatpedigree.net/).
Genotype	Origin	Parentage	Accession type	Year of release/ Collection date
HPYT 404	NA	NA	NA	-
AKW 381	India	SONALIKA/NI-5439[1324][4077];	Cultivar	1988
DBW 88	India	KAUZ,MEX//ALTAR-84/AWNED-ONAS/3/MILAN/KAUZ,MEX/4/HUITES[4145];	variety	2013
EXCALIBUR	Aus	RAC-177(Sr26)/UNICULM-492//RAC-311-S[1326];	Exotic Variety	2013
GUTHA	Aus	GAMENYA//GABO*3/KHAPSTEIN(M-146)/3/(66-W-02)FALCON*3/CHILE-1-B	Cultivar	1982
HPW 226	India	NA	NA	-
KLP 415	India	NA	NA	-
DBW 43	India	NA	NA	-
CARAZINHO	Brazil	COLONISTA/FRONTANA	Cultivar	1957
K 307	India	K-9321/UP-2003	variety	-
DL 784-3	India	KALYANSONA*4/TR-380.27*4/3-AG-14/3/HD-2281; KALYANSONA(DER)/HD-2281	Cultivar	1993
PBW 343	India	NORD-DESPREZ/VG-1944//KALYANSONA//BLUEBIRD/3/YACO(SIB)/4/VEERY-5	Cultivar	1995
HW 1085	India	UNNATH-KALYANSONA*2//CPAN-3057	Cultivar	1997
RAJ 4248	India	HW-2021/RAJ-3765	Cultivar	2013
NP 715	India	NP-52/NP-165; PUSA-52/PUSA-165	Cultivar	1948
KAUZ/AA/KAUZ	Ger`	KRONJUWEL/LP-753-75	Cultivar	1991
PBW 550	India	WH-594/RAJ-3858//W-485;WH-594/RAJ-3856//W-485[	Cultivar	2007
HD 3086	India	DBW 14/HD 2733//HUW 468	Cultivar	2013
OLYMPIC	Aus	BALDMIN/QUADRAT	Cultivar	1976
HI 977	India	GALLO/AUST-II-61-157//CIANO-67/NOROESTE-66/3/YAQUI-50-ENANO/3*KALYANSONA	Cultivar	1985
PBN 4364	India	NA	Cultivar	-
HI 1539	India	HI-1391/HI-1394	Breeding line	-
Krichauff	Aus	WARIQUAM//KLOKA/PITIC-62/3/WARIMEK/HALBERD/4/3-AG-3/AROONA; WARIQUAM//KLOKA/PITIC-62/3/HALBERD/4/3-AG-3/AROONA	Cultivar	1998
Reeves	Aus	BODALLIN//GAMENYA/INIA-66	Cultivar	1989
CRANBROOK	Aus	WREN,MEX//CIANO-67(SIB)/NOROESTE-66/3/ZAMBEZI	Cultivar	1985
HPW 155	India	BT-2549/FATH	Cultivar	2003
BWL 5489	NA	NA	NA	-
HPW 147	India	CPAN-1869/HIM-10-BA	Cultivar	1999
ATTILA	Mex	NORD-DESPREZ/VG-9144//KALYANSONA/BLUEBIRD/3/YACO/4/VEERY-5	Cultivar	1990
PBW 725	India	PBW 621//GLUPRO/3*PBW 568/3/ PBW 621	variety	2015
AKW 4731	India	NA	NA	-
NANJING 8611	China	NING-7084/YANGMAI-3//XIAD-JIAN-42	Cultivar	-
BWL 5172	NA	NA	NA	-
HD 2733	India	ATTILA/3/HUITLE(HUI)/(CARC)CARCOMUN//CHEN/(CHTO)CHORLITO/4/ATTILA	variety	2002
BWL 5433	NA	NA	NA	-
HPW 251	India	WW-24/LEMHI/P-2-II-149	Cultivar	2007
CULIACANT 89	Mex	CM744849-2M-2Y-3M-2Y-0B-46M-0Y	NA	-
KENPHAD 25	India	KENYA-58-F(L.1)/NIPHAD-4; KENYA-48-F(L.1)/NIPHAD-4; KENYA-E-144/NIPHAD-4	Cultivar	1951
DWR 162	India	KAVKAZ/BUHO//KALYANSONA/BLUEBIRD	Cultivar	1989
MACS 6222	India	HD-2189*2/MACS-2496	Cultivar	2011
PBW 394	India	NA	NA	-
6HPYT 405	NA	NA	NA	-
NP 824	India	WISCONSIN-245(SEL.44-25-7-5)/NP-770//C-518/NP-165; NP-799/NP-770//C-518/NP-165	Cultivar	1960
HB 490	NA	NA	NA	-
HI 1544	India	HINDI-62/BOBWHITE/CPAN-2099	Cultivar	2007
RAJ 1972	India	HD-2195/HD-2160; SUJATA/NP-852/3/GABO/NORIN-10-BREVOR//2*LERMA-ROJO-64-A/5/SAFED-LERMA/NP-852/4/PENJAMO-62/P-14//KENTANA-54-B/3/K-65/6/HD-2160	Cultivar	1984
NIPHAD 4	India	MOTIA(TR.DR)/(TR.DN)KHAPLI//(TR.AE)NP-4; MOTIA(TR.DR)/(TR.DN)KHAPLI	Cultivar	1942
HD 2833	India	PBW-226/HW-1042//HD-2285; MACS-2496*2/MC-10	Cultivar	2006
DBW 107	India	INQALAB-91*2/TUKURU	Cultivar	2014
HS 365	India	HS-207/SONALIKA	Cultivar	1997
BWL 5429	NA	NA	NA	-
PBW 746	India	NA	NA	-
CWCWPRE	NA	NA	NA	-
HUW 318	India	MALAVIYA-206/HUW-202; HUW-206/HUW-202	Cultivar	1991
HUW 12	India	NP-876/CIANO-67	Cultivar	1979
HD 2987	India	HI-1011/HD-2348//MENDOS//IWP-72/DL-153-2	Cultivar	2012
RAJ 3777	India	RAJ-3160/HD-2499	Cultivar	2003
PBW 677	India	NA	Breeding line	-
Westonia	Aus	CO-1190-203/84-W-127-501	Cultivar	1997
BWL 4417	NA	NA	NA	-
K 8027	India	NEW-PUSA-875/4/NORIN-10-BREVOR/YAQUI-53//YAQUI-50/3/KENTANA-54-B/5/2*K-852; D-1696/2*K-9006[3587]; HD-1969/2*K-852; RAJ-3777/WR-413	Cultivar	1988
K 68	India	NP-773/C-13; NP-773/K-13	Cultivar	1968
HUW 206	India	KAVKAZ/(SIB)BUHO//KALYANSONA/BLUEBIRD	Cultivar	1985
DBW 16	India	RAJ-3765/WR-484//HUW-468	Cultivar	2005
6HPYT 435	NA	NA	NA	-
HD 2851	India	CPAN-3004/WR-426/HW-2007	Cultivar	2005
DBW 71	India	PRINIA/UP-2425	Cultivar	2013
INSIGNIA	Aus	GHURKA/RANEE	Cultivar	1946
NARBADA 4	India	HYBRID-1-1/BN-179; CHINESE/KENYA//DURO-NATIVO/3/MARROQUI/CHINESE; PKD-4/MP-4; NP-830/3/PW-5//THATCHER/NP-165	Cultivar	1970
HD 2888.1	India	RAJ-3765/GW-322; C-306/TR.SH//HW-2004	Cultivar	2006
C 306	India	REGENT/CZECHOSLOVAKIA-3//2*C-591/3/C-217/NIPHAD-4//C-281; REGENT-1974/3*CZECHOSLOVAKIA//2*C-591/3/819/C-281; REGENT-1974/3*CZECHOSLOVAKIA//C-591/3/P-1-19/C-281; REGENT-1974/CH-23//2*C-591/3/P-19/C-281; KAUZ/STAR//HD-2643	Cultivar	1965
MACS 6145	NA	C-306*9/CS-2A-2M-4-2[4280]; AJAIA-12/F3-LOCAL(SEL.ETHIO.135.85)//PLATA-13/3/SOMAT3/4/SOOTY-9/RASCON-37[4281]	Cultivar	2004
BWL 5487	NA	NA	NA	-
GW 366	India	DL-802-3/GW-232	Cultivar	2006
BWL 4424	NA	NA	NA	-
GOLDMARK	Aus	PAVON-76(SIB)/TM-56	Cultivar	1998
IRENA	Mex	BUCKBUCK/FLICKER//MYNA/VULTURE	Cultivar	1992
NP 792	India	KENYA-C-10854(KENYA-E-220)/NP-165; PUSA-165/E-220	Cultivar	1954
Kharchia 65 R	India	EG-593/KHARCHIA; KHARCHIA-LOCAL*5/EG-953; UP-2441/K-9330	Cultivar	1971
MP 4010	India	TEETER(SIB)/(SIB)JUNCO	Cultivar	2003
SAFED LERMA	India	YAQUI-50/3/NORIN-10/BREVOR//LERMA-52/4/LERMA-ROJO-64	Cultivar	1967
HYB 65	India	BOBIN//BOBIN/GAZA/3/A-115; GABO(AUS)/A-115; E-61/A-115	Cultivar	1952
SYNTHETIC 18	NA	NA	NA	-
HYB 633	India	EX-76/EB-73; E-73/EB-76; LOCAL/EX-73	Cultivar	1965
WH 1022	India	WH-283/UP-2338	Breeding line	-
BWL 5199	NA	NA	NA	-
HD 1981	India	E-5557/HD-845	Cultivar	1974
PBW 744	NA	NA	NA	-
ALONDRA	Mex	D-6301/NAINARI-60//WEIQUE/RED-MACE/3/CIANO-F-67*2/CHRIS; D-6301/NAINARI-60/WEIQUE/ROJAL-DE-MURCIA/3/CIANO*2/CHRIS	Cultivar	1974
PBW 373	India	NORD-DESPREZ/VG-1944//KALYANSONA//BLUEBIRD/3/YACO(SIB)/4/VEERY-5; NORD-DESPREZ/VG-9144//KALYANSONA/BLUEBIRD/3/YACO/4/VEERY-5	Cultivar	1996
K 9107	India	K-8101/K-68	Cultivar	1995
CHOTI LERMA	Iran	LERMA-ROJO-64(SIB)/HUAMANTLA-ROJO	Cultivar	1974
SUNMIST	Aus	(S)MISKLE	Cultivar	1993
BWL 5434	NA	NA	NA	-
ROLLER-1	Mex	FUFAN-17/VEERY-5	Cultivar	1994
HI 1500	India	HW-2002*2//STRAMPELLI/PNC-5	Cultivar	2003
BWL 5233	NA	NA	NA	-
LOK 66	NA	NA	NA	-
BWL 4425	NA	NA	NA	-
NP 818	India	DEMOCRAT/C-518//SPALDINGS-PROLIFIC/NP-114/3/KENYA-C-10854; W-245/NP-165//C-518/NP-770/3/E-220	Cultivar	1965
RW 346	India	JANAK/SA-42	Cultivar	1989
WB 2	India	T.DICOCCON CI9309/AE.SQUARROSA (409)/3/MILAN/S87230//BAV92/4/2*MILAN/S87230 //BAV92 a	Cultivar	2017
EGRET	Aus	HERON/2*WW-15	Cultivar	1973
WH 542	India	JUPATECO-73/BLUEJAY//URES-81	Cultivar	1992
VL 907	India	DYBR-1982-83/842-ABVD-50/VW-9365//PBW-343	Cultivar	2011
HI 385	India	HYBRID-633/NP-842	Cultivar	1975
WL 410	India	SONORA-63/S-326//KALYANSONA	Cultivar	1976
BWL 5488	NA	NA	NA	-
UP 2425	India	HD-2320/UP-2263	Cultivar	1998
HD2687	India	CPAN-2009/HD-2329	Cultivar	2002
WH 1105	India	MILAN/S 87230//BABAX	Cultivar	2013
HINDI 62	India	PBW-226/HW-1042//HD-2285	Breeding line	1939
UP 2382	India	CPAN-2004/HD-2204	Cultivar	1998
RAJ 3765	India	HD-2402/VL-639; HP-1633/HP-1776	Cultivar	1995
HB 208	India	E-4717/KIRAN; E-4717/HB-M-65-50; SUP/MENTANA//MARQUIS/2*RENOWN/3/KIRAN; SUPREMO/MENTANA//MARQUIS/2*RENOWN/3/PENJAMO-62(SIB)/P-14//KENTANA-54-B	Cultivar	1981
HD 2808	India	NA	NA	-
NIAW 34	India	CIANO-79/(SIB)PARULA; UP-368-SHAILZA//WH-157-Bulk-1858/GP-104	variety	1996
MPO 1259	India	NA	NA	-
HD2009	India	LERMA-ROJO-64-A/NAINARI-60; LERMA-ROJO-64/NAINARI-60	Breeding line	1974
BANKS	Aus	PWTH/(SIB)CONDOR//2*CONDOR	Cultivar	1979
GW 322	India	PBW-173/GW-196	Cultivar	2002
HS 277	India	KAVKAZ(w)/(s)CIGUENA	Cultivar	1994
DPW 621-50	India	KAUZ//ALTAR-84/(AOS)AWNED-ONAS/3/MILAN/KAUZ/4/HUITES	Cultivar	2012
AKW 1071	India	VEERY/3/FORLANI/ACCIAIO//ANAHUAC-75	Cultivar	1992
NP 165	India	NP-4/FEDERATION	Cultivar	1930
SUNCO	Aus	SUN-9-E-27*4/3-AG-14//WW-15/3/3*COOK	Cultivar	1986
PBW 761	NA	NA	Cultivar	-
MACS 2496	India	KAVKAZ/BUHO//KALYANSONA/BLUEBIRD; AGATHA/YECORA-70	Cultivar	1992
BWL 4433	NA	NA	NA	-
RAJ 1482	India	NAPO-63/TOBARI-66//KALYANSONA/BLUEBIRD; CARTHAGE//KALYANSONA/BLUEBIRD; NAPO-63/TOBARI-66//II-8156/3/KALYANSONA/BLUEBIRD	Cultivar	1982
RAJ 3077	India	HD-2267/RAJ-1482//RAJ-1802	Cultivar	1987
PBW 590	India	WH-594/RAJ-3814//W-485	Cultivar	2008
BWL 5202	India	NA	NA	-
C 591	India	PENJAB-TYPE-8-B/PENJAB-TYPE-9/ PB-TYPE-9/8-B	Cultivar	1934
BWL 5200	India	NA	NA	-
Calingiri	India	CHINO/KULIN//REEVES	Cultivar	1997
Kater-1	Mex	COOK/VEERY//DOVE/SERI-82/3/BLUEJAY/COCORAQUE-75	Cultivar	1999
Arrino	Aus	77-W-660/ERADU	Cultivar	1997
Carnamah	Aus	BOLSENA-1-CH(RAC-529)/77-W-660; RAC-529-911/77-W-660	Cultivar	1996
Vee/Myna	Mex	NORD-DESPREZ/WAGGA-WAGGA//LEE/FRONTANA/3/NEWTHATCH/4/TANORI-73; NORD-DESPREZ/WAGGA-WAGGA//LEE/FRONTANA/3/NEWTHATCH/4/TANORI-71-RESEL	Cultivar	1979
INIA F66	Mex	LERMA-ROJO-64/SONORA-64	Cultivar	1966
IC 443683	India	NA	NA	-
Kalyansona	India	PENJAMO-62(SIB)/GABO-55	Cultivar	1969
Karlgarin	Aus	SPEAR/79-W-781	Cultivar	-
Kukri	Aus	MADDEN/6*RAC-177//GRAJO/76-ECN-44; SR13*3//76-ECN-44/76-ECN-36; CO-1213/RAC-549; DRP((FRONTANA/KENYA-58//N10B/G55)NAINARI-60)/(TOBARI-66/CIANO-67//TOBARI-66/8156/3/CALIDAD//BLUEBIRD/CIANO-67)/2/MADDEN/6*RAC-177	Cultivar	1999
Kulin	Aus	BODALLIN(SIB)/(SIB)HYDEN	Cultivar	1986
Nayabing	NA	NA	NA	-
Songlen	Aus	LERMA-ROJO-64/SONORA-64-A//(SIB)TIMGALEN	Cultivar	1975
Spear	Aus	RAC-111/INSIGNIA	Cultivar	1983
WL 711	India	SONALIKA/CHRIS//KALYANSONA	Cultivar	1976
IC 335732	India	NA	NA	-
IC 397347	India	NA	NA	2003
EC 11179	USA	NA	NA	1956
EC 573631	NA	NA	NA	2006
EC 574379	NA	NA	NA	2006
IC 338826	India	NA	NA	-
HW 4207	India	HS-240*3//COOK*6/C-80-1	Cultivar	-
EC 576569	NA	NA	NA	2006
DBW 14	India	RAJ-3765/PBW-343[3320][4138][4182]; UP-2338/CENTURK[4281];	Cultivar	2002
IC 577497	India	NA	NA	-
IC 104608	India	NA	NA	-
IC 104621	India	NA	NA	-
IC 107381	India	NA	NA	-
IC 111800	India	NA	NA	-
IC 111918	India	NA	NA	-
HD 2888.2	India	NA	NA	2006
DHARWAD DRY	Mex	NA	NA	1994
Bacanora F-88	Mex	JUPATECO-73/(SIB)BLUEJAY//URES-81	Cultivar	1988
Baviocora H-92	Mex	NA	NA	1992
KRL-1-4	India	KHARCHIA-LOCAL/WL-711	Cultivar	1989
RAJ 4037	India	DL-788-2/RAJ-3717	Cultivar	2004
WH760	NA	NA	-	-
BWL 0814	NA	NA	-	-
EC 252874	NA	NA	-	-
IEPERA RAFE	NA	NA	-	-
GIZA 155	Egypt	GIZA-144/3/MIDA, USA/CADET,USA//2*HINDI-62[1322]; MIDA/CADET,USA//HINDI-62/3/GIZA-144; GIZA-144//MIDA/CADET,USA/3/HINDI-62; REGENT-975-11/2*GIZA-139/3/MIDA/CADET,USA//HINDI-62	Cultivar	1968
IC 212185	India	NA	-	-
RAJ 4083	India	PBW-343/UP-2442//WR-258/UP-2425	Cultivar	2006
K 9465	India	HD-2160/K-68	Cultivar	1997
IC 118737	India	NA	-	-
NIA 845	NA	NA	-	-
KHAPLI	India	LV-IND	land race	1908
DL 1266-5	India	SFW(LOCAL_GERMPLASM)/VAISHALI	Breeding line	2000
CBW 12	India	NA	-	-
BEVY 2	NA	NA	-	-
KRL 19	India	PBW-255/KRL-1-4	-	-
AKAW 65-1	India	NA	-	-
WH 102	India	NA	-	-
Pavon F76	Mex	VICAM-71//CIANO-67/SIETE-CERROS-66/3/KALYANSONA/BLUEBIRD	Cultivar	1976
WILGOYNE	Aus	CIANO-67/GALLO	Cultivar	1988
PISSI LOCAL	India	LV-MADHYA-PRADESH	land race	-
KHARCHIA LOCAL	India	(S)LV-RAJASTHAN	land race	-
SONALIKA	India	II-53-388/ANDES//(SIB)PITIC-62/3/LERMA-ROJO-64	Cultivar	1976
SHANGHAI	China	(M)YANGMAI-1	Cultivar	1978
NIAW 1415	India	GW-9506/PARULA//PARULA	Cultivar	2011
ROLLER	Mex	FUFAN-17/VEERY-5	Cultivar	1991
HD 2932	India	HD-2252/UP-262; KAUZ/STAR//HD-2643	Cultivar	2007
AKW 770	NA	NA	-	-
KLP 414	NA	NA	-	-
MN75136/PGO	USA	ND-522/MN-69124	Breeding line	-
IC 107921	India	NA	-	-
IC 111848	India	NA	-	-
IC 335700	India	NA	-	-
IC 401952	India	NA	-	1988
NA, Not available

## Sheet: Table S3
Table S3: Genotypic and phenotypic variance and broad sense Heritability (h2) for all traits measured under low P and optimum P condition for all 204 accessions.
Traits	P level	Genotypic Variance	Phenotypic Variance	Heritability (h2)
TRL	OP	662.333	1310.53	0.51
	LP	8912	9925	0.9
TSA	OP	3.618	6.726	0.54
	LP	15.62	17.99	0.87
AVD	OP	0.00170575	0.00205075	0.83
	LP	0.0036485	0.0040445	0.9
RVL	OP	0.003716	0.005229	0.71
	LP	0.0042615	0.0061625	0.69
TIP	OP	7481.25	12406.2	0.6
	LP	34559	44856	0.77
RDW	OP	0.000349425	0.000439925	0.79
	LP	0.00017825	0.00027795	0.64
TBM	OP	0.0112575	0.0142475	0.8
	LP	0.00323	0.00468	0.69
SDW	OP	0.0078675	0.0100675	0.78
	LP	0.00209225	0.00296325	0.71
RMR	OP	0.00038975	0.00066475	0.59
	LP	0.000903	0.00135	0.67
PRL	OP	16.1025	26.1825	0.61
	LP	19.7475	29.1175	0.67
P CON	OP	1.59825	1.81125	0.88
	LP	0.241825	0.256725	0.93
TPU	OP	0.808233	1.05983	0.76
	LP	0.0075175	0.0115875	0.65
PER	OP	0.000278967	0.000320267	0.87
	LP	0.03552	0.03878	0.92
PUtE	OP	0.000214033	0.000253833	0.84
	LP	0.0053185	0.0064315	0.83
PUpE	OP	149.3	217.2	0.69
	LP	5.4395	5.9575	0.91
SRL	OP	3.26934e+06	5.26839e+06	0.62
	LP	2.04155e+06	3.54978e+06	0.58

## Sheet: Table S4 
Table S4a. Genetic correlations among 16 tested traits under optimum P condition for all 204 accessions
Traits	TRL	TSA	RVL	AVD	TIP	RDW	TBM	SDW	RMR	PRL	P_CON	TPU	PER	PUtE	PUpE
TSA	0.72***
RVL	0.36***	0.19**
AVD	-0.18**	-0.32***	0.31***
TIP	0.31***	0.43***	-0.05	-0.5***
RDW	0.26***	0.05	0.85***	0.44***	-0.15**
TBM	0.30***	0.13	0.83***	0.33***	-0.13**	0.94***
SDW	0.30***	0.14*	0.82***	0.31***	-0.13**	0.92***	0.94***
RMR	0.03	-0.17**	0.45***	0.44***	-0.11	0.56***	0.27***	0.21**
PRL	0.47***	0.73***	-0.04	-0.6***	0.47***	-0.07	0.02	0.04	-0.23***
P_CON	-0.22***	0.11	-0.23***	0.05	0.03	-0.32***	-0.36***	-0.37***	0.04	-0.2**
TPU	0.21**	0.16**	0.76***	0.39***	-0.15***	0.86***	0.92***	0.92***	0.28***	-0.1	0.05
PER	0.25***	0.1	0.24***	0	0.06	0.35***	0.37***	0.37***	0.06	0.25***	-0.97***	-0.07
PUtE	0.29***	0.13*	0.75***	0.31***	-0.11	0.92***	0.96***	0.96***	0.26***	0.08	-0.62***	0.71***	0.63***
PUpE	-0.24***	0.17**	-0.45***	-0.2***	0.11	-0.6***	-0.46***	-0.42***	-0.6***	-0.1	0.75***	-0.15	-0.77***	-0.64***
SRL	-0.08	0.24***	-0.79***	-0.5***	0.21**	-0.9***	-0.87***	-0.85***	-0.53***	0.11	0.27***	-0.82***	-0.28***	-0.8***	0.59***
*, ** and *** significant at P < 0.05, P < 0.01 and P < 0.001, respectively. Highly positive and negative correlations appear in red and green respectively.
Table S4b. Genetic correlations among 16 tested traits under low P condition for all 204 accessions
Traits	TRL	TSA	RVL	AVD	TIP	RDW	TBM	SDW	RMR	PRL	P_CON	TPU	PER	PUtE	PUpE
TSA	0.72***
RVL	0.75***	0.46***
AVD	0.01	-0.34***	0.30***
TIP	0.1	0.44***	-0.09	-0.80***
RDW	0.50***	0.35***	0.68***	0.08	0.13
TBM	0.52***	0.30***	0.72***	0.16**	0.02	0.87***
SDW	0.50***	0.27***	0.70***	0.17**	-0.01	0.79***	0.99***
RMR	-0.03	0.1	-0.04	-0.1	0.21**	0.28***	-0.21**	-0.35***
PRL	0.20**	0.50***	0	-0.65***	0.75***	0.24***	0.14	0.1	0.18**
P_CON	-0.43***	-0.24***	-0.55***	-0.42***	0.27***	-0.51***	-0.55***	-0.54***	0.03	0.19**
TPU	-0.09	-0.06	-0.09	-0.38***	0.35***	0.13	0.16*	0.16*	-0.09	0.37***	0.68***
PER	0.53***	0.21***	0.61***	0.47***	-0.34***	0.57***	0.62***	0.61***	-0.09	-0.19**	-0.90***	-0.57***
PUtE	0.57***	0.25***	0.70***	0.33***	-0.20**	0.75***	0.83***	0.82***	-0.15	-0.07	-0.78***	-0.27***	0.93***
PUpE	-0.39***	-0.26***	-0.50***	-0.38***	0.21**	-0.58***	-0.46***	-0.40***	-0.30***	0.13	0.94***	0.69***	-0.81***	-0.68***
SRL	0.73***	0.47***	0.26***	-0.08	0.03	-0.28***	-0.15*	-0.11	-0.32***	0.07	-0.06	-0.23***	0.09	0	0.06
*, ** and *** significant at P < 0.05, P < 0.01 and P < 0.001, respectively. Highly positive and negative correlations appear in red and green respectively.
Table S4c. Phenotypic correlations among 16 tested traits under optimum P condition for all 204 accessions
Traits	TRL	TSA	RVL	AVD	TIP	RDW	TBM	SDW	RMR	PRL	P_CON	TPU	PER	PUtE	PUpE
TSA	0.66***
RVL	0.37***	0.19**
AVD	-0.16*	-0.28***	0.34***
TIP	0.31***	0.40***	0.03	-0.44***
RDW	0.22***	0.04	0.77***	0.42***	-0.13
TBM	0.25***	0.11	0.76***	0.32***	-0.12	0.94***
SDW	0.25***	0.12	0.74***	0.29***	-0.11	0.91***	0.90***
RMR	0.03	-0.13	0.38***	0.41***	-0.09	0.54***	0.24***	0.17*
PRL	0.47***	0.67***	0.01	-0.50***	0.46***	-0.06	0.02	0.03	-0.19**
P_CON	-0.15*	-0.07	-0.20**	0.04	0	-0.32***	-0.36***	-0.36***	0.01	-0.16*
TPU	0.19**	0.06	0.70***	0.35***	-0.12	0.83***	0.89***	0.89***	0.23***	-0.05	0.06
PER	0.17**	0.06	0.21**	-0.01	0.03	0.32***	0.34***	0.33***	0.04	0.18**	-0.97**	-0.08
PUtE	0.23***	0.09	0.70***	0.29***	-0.1	0.89***	0.93***	0.93***	0.23***	0.06	-0.61***	0.71***	0.61***
PUpE	-0.16*	0	-0.39***	-0.23***	0.07	-0.58***	-0.42***	-0.38***	-0.64***	-0.05	0.71***	-0.12	-0.73***	-0.59***
SRL	0	0.11	-0.67***	-0.41***	0.15*	-0.86***	-0.82***	-0.79***	-0.52***	0.1	0.25***	-0.78***	-0.25***	-0.76***	0.56***
*, ** and *** significant at P < 0.05, P < 0.01 and P < 0.001, respectively. Highly positive and negative correlations appear in red and green respectively.
Table S4d. Phenotypic correlations among 16 tested traits under low P condition for all 204 accessions
Traits	TRL	TSA	RVL	AVD	TIP	RDW	TBM	SDW	RMR	PRL	P_CON	TPU	PER	PUtE	PUpE
TSA	0.71***
RVL	0.72***	0.44***
AVD	0	-0.33***	0.34***
TIP	0.11	0.43***	-0.03	-0.77***
RDW	0.47***	0.33***	0.60***	0.07	0.12
TBM	0.49***	0.29***	0.65***	0.15	0.02	0.87***
SDW	0.47***	0.26***	0.63***	0.16	-0.01	0.79***	0.95***
RMR	-0.03	0.09	-0.04	-0.09	0.19	0.30***	-0.19**	-0.33***
PRL	0.20**	0.48***	0.04	-0.61***	0.72***	0.22***	0.13	0.1	0.15**
P_CON	-0.43***	-0.22***	-0.53***	-0.42***	0.28***	-0.47***	-0.50***	-0.48***	0	0.12
TPU	-0.1	-0.02	-0.1	-0.37***	0.36***	0.21***	0.25***	0.25***	-0.1	0.29***	0.65***
PER	0.47***	0.24***	0.59***	0.38***	-0.30***	0.51***	0.59***	0.59***	-0.11	-0.15	-0.90***	-0.55***
PUtE	0.50***	0.27***	0.66***	0.31***	-0.16	0.73***	0.84***	0.84***	-0.17**	-0.04	-0.76***	-0.21***	0.91***
PUpE	-0.31***	-0.22***	-0.30***	-0.38***	0.22***	-0.54***	-0.41***	-0.35***	-0.33***	0.07	0.93***	0.65***	-0.81**	-0.66***
SRL	0.64***	0.48***	0.23***	-0.1	0.04	-0.32***	-0.17	-0.12	-0.35***	0.07	-0.06	-0.28***	0.09	-0.05	0.07
*, ** and *** significant at P < 0.05, P < 0.01 and P < 0.001, respectively. Highly positive and negative correlations appear in red and green respectively.

## Sheet: Table S5
Table S5: The PCA ranking values derived from principal components (PC) 1 to 4 using 15 traits of wheat under two P levels.
S.No.	Genotype	PCA ranking values
1	SHANGHAI	311.311	Ten P Use efficient genotyes
2	Pavon F76	297.795
3	BWL 5233	296.556
4	SONALIKA	294.037
5	KHARCHIA LOCAL	289.552
6	WH 102	287.461
7	BWL 4425	275.123
8	HD 2888.2	273.556
9	CBW 12	272.695
10	MN75136/PGO	269.066
11	KRL 19	268.872
12	ROLLER	267.499
13	EXCALIBUR	265.861
14	HI 385	263.246
15	VL 907	262.94
16	BEVY 2	262.91
17	AKW 381	255.89
18	GUTHA	255.549
19	IC 104608	253.722
20	IC 107381	252.559
21	PISSI LOCAL	251.495
22	IC 104621	251.32
23	LOK 66	251.092
24	WILGOYNE	249.597
25	BWL 5488	249.492
26	IC 111918	249.432
27	DBW 43	248.12
28	HPW 226	247.118
29	HW 4207	243.219
30	IC 577497	242.039
31	AKAW 65-1	241.088
32	CARAZINHO	240.998
33	WH 542	240.465
34	HD 2932	239.712
35	IC 111800	239.712
36	EC 574379	239.451
37	PBW 590	237.36
38	DBW 88	237.141
39	HI 1500	234.942
40	HPYT 404	232.306
41	KLP 414	229.152
42	IC 338826	229.063
43	DBW 14	228.954
44	UP 2425	227.831
45	CHOTI LERMA	224.466
46	WB 2	223.043
47	IC 107921	222.741
48	IC 335700	217.626
49	NP 818	217.35
50	RAJ 3077	216.685
51	AKW 770	212.972
52	WH 1022	210.845
53	HW 1085	210.46
54	K 9107	210.187
55	NIAW 1415	210.164
56	RW 346	204.777
57	BWL 5434	204.339
58	KRL-1-4	203.549
59	WL 410	201.226
60	KLP 415	194.702
61	HD 2733	194.488
62	PBW 373	191.086
63	6HPYT 435	189.161
64	K 307	187.459
65	NP 715	186.519
66	NIAW 34	185.812
67	PBW 343	185.665
68	EC 573631	184.416
69	RAJ 1482	183.352
70	C 591	182.939
71	EC 576569	180.826
72	KENPHAD 25	179.61
73	DL 784-3	178.728
74	HD 3086	178.275
75	HUW 318	178.196
76	IC 401952	177.909
77	NARBADA 4	177.605
78	GOLDMARK	177.493
79	DHARWAD DRY	176.9
80	RAJ 4248	176.435
81	BWL 5202	176.379
82	Reeves	175.799
83	PBW 761	174.456
84	HI 1544	172.792
85	HD 2851	172.778
86	SUNMIST	172.649
87	BWL 4417	172.051
88	Kalyansona	171.759
89	DWR 162	171.415
90	HB 208	171.398
91	Baviocora H-92	171.367
92	KAUZ/AA/KAUZ	171.201
93	HPW 155	171.025
94	HI 977	170.697
95	HD 2687	168.682
96	HI 1539	168.134
97	WH 1105	168.119
98	ATTILA	167.813
99	DBW 71	167.163
100	CULIACANT 89	166.901
101	Kater-1	166.893
102	PBW 550	166.661
103	EC 11179	165.662
104	HINDI 62	164.772
105	RAJ 3765	164.672
106	IC 111848	163.144
107	AKW 1071	163.079
108	AKW 4731	161.401
109	HYB 65	160.828
110	6HPYT 405	160.768
111	PBW 744	159.921
112	BWL 5489	159.601
113	RAJ 4037	159.314
114	PBW 746	159.194
115	MACS 6222	159.152
116	PBW 394	159.054
117	HUW 12	158.946
118	BWL 5433	158.791
119	DBW 16	158.785
120	BWL 5429	158.176
121	ROLLER-1	157.243
122	Vee/Myna	156.914
123	MACS 6145	156.661
124	BWL 5199	156.008
125	NP 824	155.039
126	Calingiri	154.921
127	HD2009	154.837
128	DPW 621-50	154.328
129	NANJING 8611	154.131
130	BWL 5200	153.81
131	UP 2382	153.581
132	K 8027	153.569
133	EGRET	153.557
134	HD 2808	152.443
135	NP 165	151.952
136	PBW 725	151.886
137	IC 443683	151.756
138	HYB 633	151.625
139	MP 4010	151.444
140	PBN 4364	151.329
141	SUNCO	151.09
142	GW 322	151.011
143	BWL 5172	150.725
144	DBW 107	150.649
145	Kharchia 65 R	150.25
146	Songlen	149.665
147	IRENA	149.282
148	K 68	149.243
149	Krichauff	148.999
150	ALONDRA	148.898
151	BANKS	148.552
152	IC 397347	148.412
153	INSIGNIA	147.669
154	Spear	147.518
155	NP 792	147.443
156	CRANBROOK	146.733
157	HPW 147	146.732
158	BWL 4433	146.56
159	Karlgarin	146.218
160	HD 2987	146.14
161	C 306	145.394
162	MPO 1259	145.166
163	DL 1266-5	145.008
164	HD 1981	144.595
165	BWL 4424	143.913
166	NIPHAD 4	142.364
167	SYNTHETIC 18	142.216
168	Nayabing	140.101
169	HD 2888.1	140.063
170	KHAPLI	139.543
171	HPW 251	139.196
172	RAJ 1972	138.834
173	INIA F66	138.534
174	GW 366	138.105
175	Bacanora F-88	137.795
176	OLYMPIC	137.44
177	Kulin	137.335
178	Kukri	136.775
179	HUW 206	136.572
180	PBW 677	136.147
181	Arrino	135.788
182	BWL 5487	135.334
183	SAFED LERMA	135.225
184	GIZA 155	134.553
185	Westonia	134.488
186	CWCWPRE	133.328
187	EC 252874	132.604
188	RAJ 3777	131.573
189	Carnamah	131.096
190	HS 277	130.669
191	WL 711	129.646
192	RAJ 4083	129.465
193	HD 2833	128.735
194	HS 365	127.979	Ten P Use in-efficient genotyes
195	WH760	126.824
196	IEPERA RAFE	123.567
197	IC 212185	122.237
198	NIA 845	121.205
199	K 9465	118.037
200	MACS 2496	116.303
201	IC 335732	114.581
202	IC 118737	114.283
203	HB 490	111.534
204	BWL 0814	107.732
